# Supplementary material for: Identification of novel long non-coding RNAs in triple-negative breast cancer
Source: PubMed Central journal article supplement (PMC4673299; doi:10.18632/oncotarget.4419), 2015-06-10
Supplement: oncotarget-06-21730-s001.pdf [file oncotarget-06-21730-s001.pdf]

## Identification of novel long non-coding RNAs in triple-negative breast cancer

### Supplementary Material

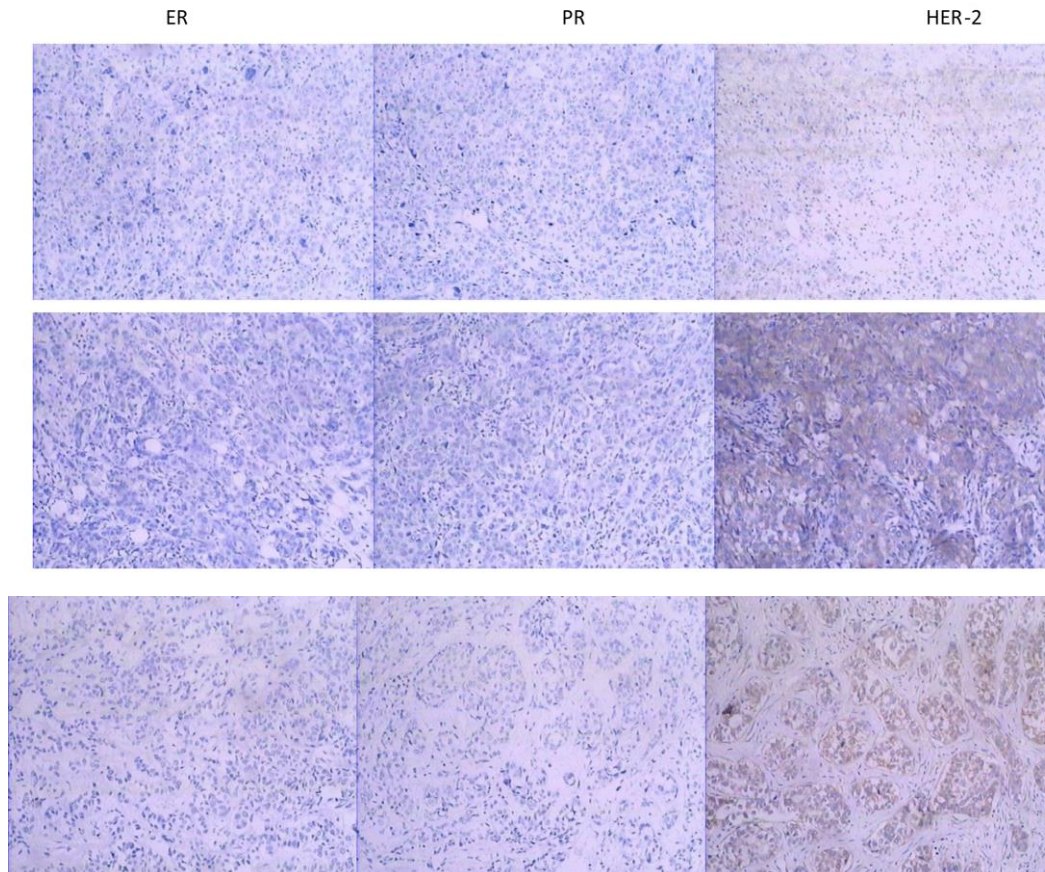

Fig.1S: Immunochemical staining of estrogen receptor/progesterone receptor and ErbB2 receptor of 3 TNBC samples for microarray analysis

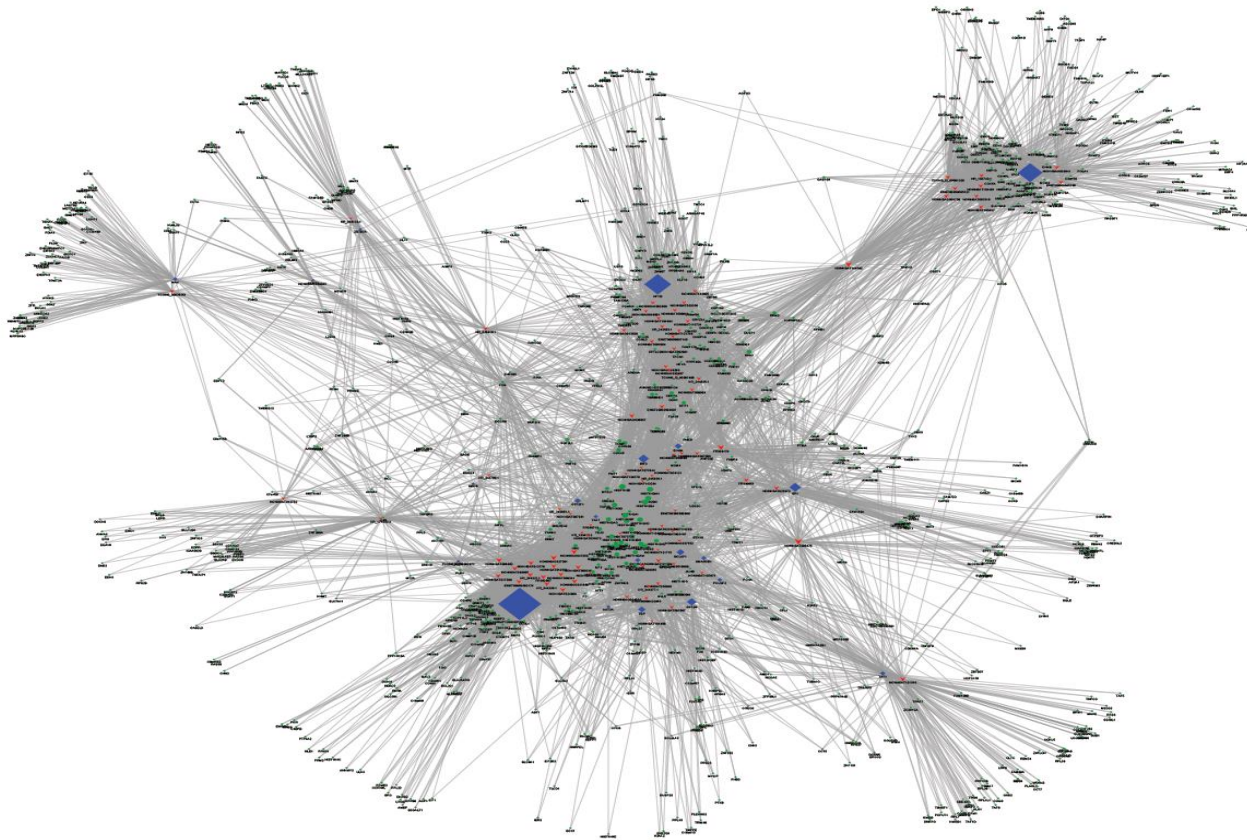

Fig.2S LncRNA-mRNA network was constructed based on the correlation analysis between the differential expressed lncRNAs and mRNAs. In the network, blue nodes represent transcription factors, red nodes represent the lncRNAs and green nodes represent the target mRNAs. The size of node is proportional to the outgoing link number. The thickness of outgoing link represents statistical relationship to the number of occurrences of the results proportionally.

Table S1 The demographic characteristics of 15 TNBC cases

| Patient Number | Patient Code | Sex | Age (years) | Diagnosis     | Surgery date | ER | PR | HER2 |
|----------------|--------------|-----|-------------|---------------|--------------|----|----|------|
| 1              | WMY          | F   | 50          | Breast cancer | 2012. 07. 12 | -  | -  | 1-2+ |
| 2              | ZHX          | F   | 49          | Breast cancer | 2012. 07. 11 | -  | -  | 2+   |
| 3              | CYF          | F   | 46          | Breast cancer | 2012. 07. 11 | -  | -  | 2+   |
| 4              | FDL          | F   | 59          | Breast cancer | 2012. 07. 13 | -  | -  | 1-2+ |
| 5              | FSF          | F   | 41          | Breast cancer | 2010. 06. 29 | -  | -  | 1-2+ |
| 6              | HSX          | F   | 59          | Breast cancer | 2010. 08. 31 | -  | -  | +    |
| 7              | JHF          | F   | 58          | Breast cancer | 2010. 06. 11 | -  | -  | 1-2+ |
| 8              | HLY          | F   | 56          | Breast cancer | 2010. 03. 25 | -  | -  | 2+   |
| 9              | GJQ          | F   | 39          | Breast cancer | 2010. 06. 29 | -  | -  | 1-2+ |
| 10             | LCF          | F   | 55          | Breast cancer | 2011. 09. 13 | -  | -  | -    |
| 11             | LMY          | F   | 57          | Breast cancer | 2012. 07. 13 | -  | -  | -    |
| 12             | ZAW          | F   | 54          | Breast cancer | 2011. 07. 02 | -  | -  | 2+   |
| 13             | CXX          | F   | 72          | Breast cancer | 2011. 01. 05 | -  | -  | +    |
| 14             | WXN          | F   | 41          | Breast cancer | 2010. 02. 08 | -  | -  | +    |
| 15             | LXX          | F   | 52          | Breast cancer | 2012. 07. 13 | -  | -  | +    |

Table S2 The primer sequences for Real-time PCR.

| No. | lncRNAs         | Forward primer         | Reverse primer         | Product length(bp) | Ta(°C) |
|-----|-----------------|------------------------|------------------------|--------------------|--------|
| 1   | ENST00000503938 | TTGTAAAGAGCTGTAAAGGGCA | TCAGCATTTTCGGTTACATGAT | 104                | 53     |
| 2   | NONHSAT012762   | GACCAGTCTGGTGTCTT      | GTGCACAGCTCAGGATCA     | 100                | 55     |
| 3   | XR_250621.1     | GAATATACGGGCTACAGAGGA  | TGTTTGGATTCTGATGGGAG   | 149                | 60     |
| 4   | NONHSAT125629   | GAGCCCTCCGGACAGAG      | AGGAGGTAATTCGGCATGCT   | 187                | 60     |
